# Supplementary material
Source: publisher site journal article supplement (https://www.dovepress.com/article/396484)
Supplement: Supplementary file 1 [file get_supplementary_file.php]

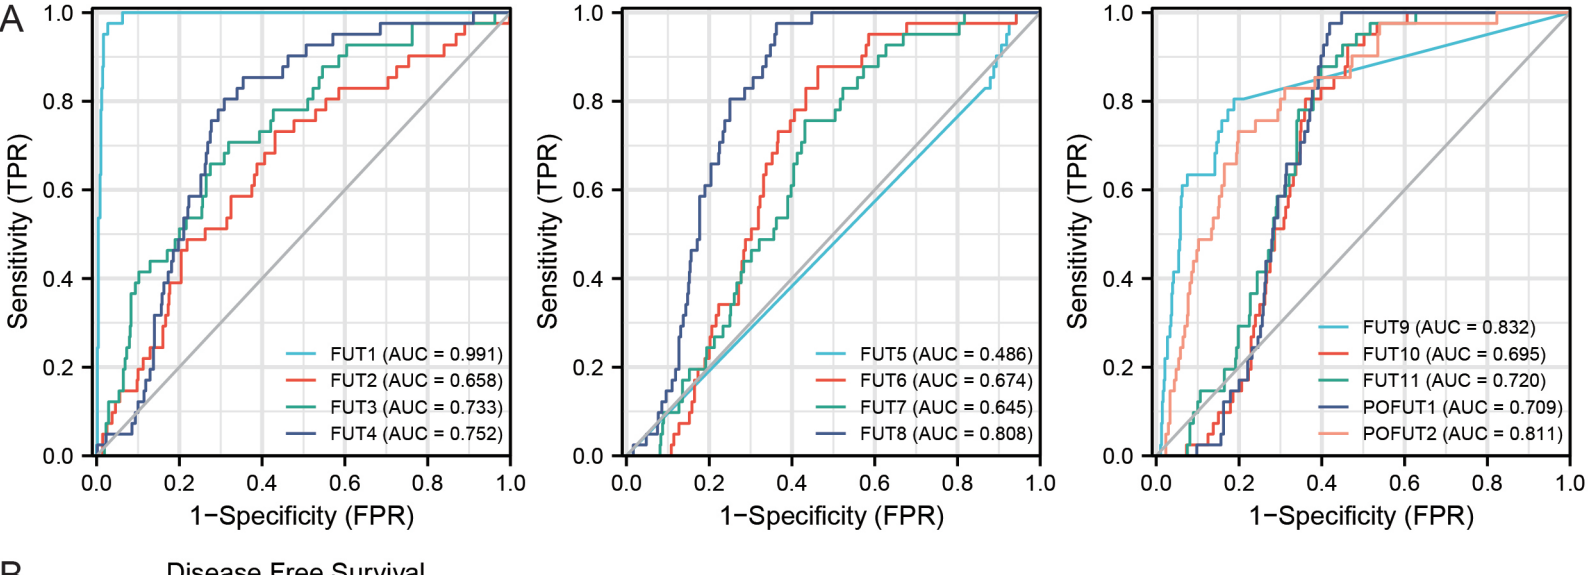

Supplementary Figure 1. (A) Diagnostic ROC curves of FUTs in the TCGA cohort. (B) Association between the expression of FUT1 and Disease Free Survival (DFS).

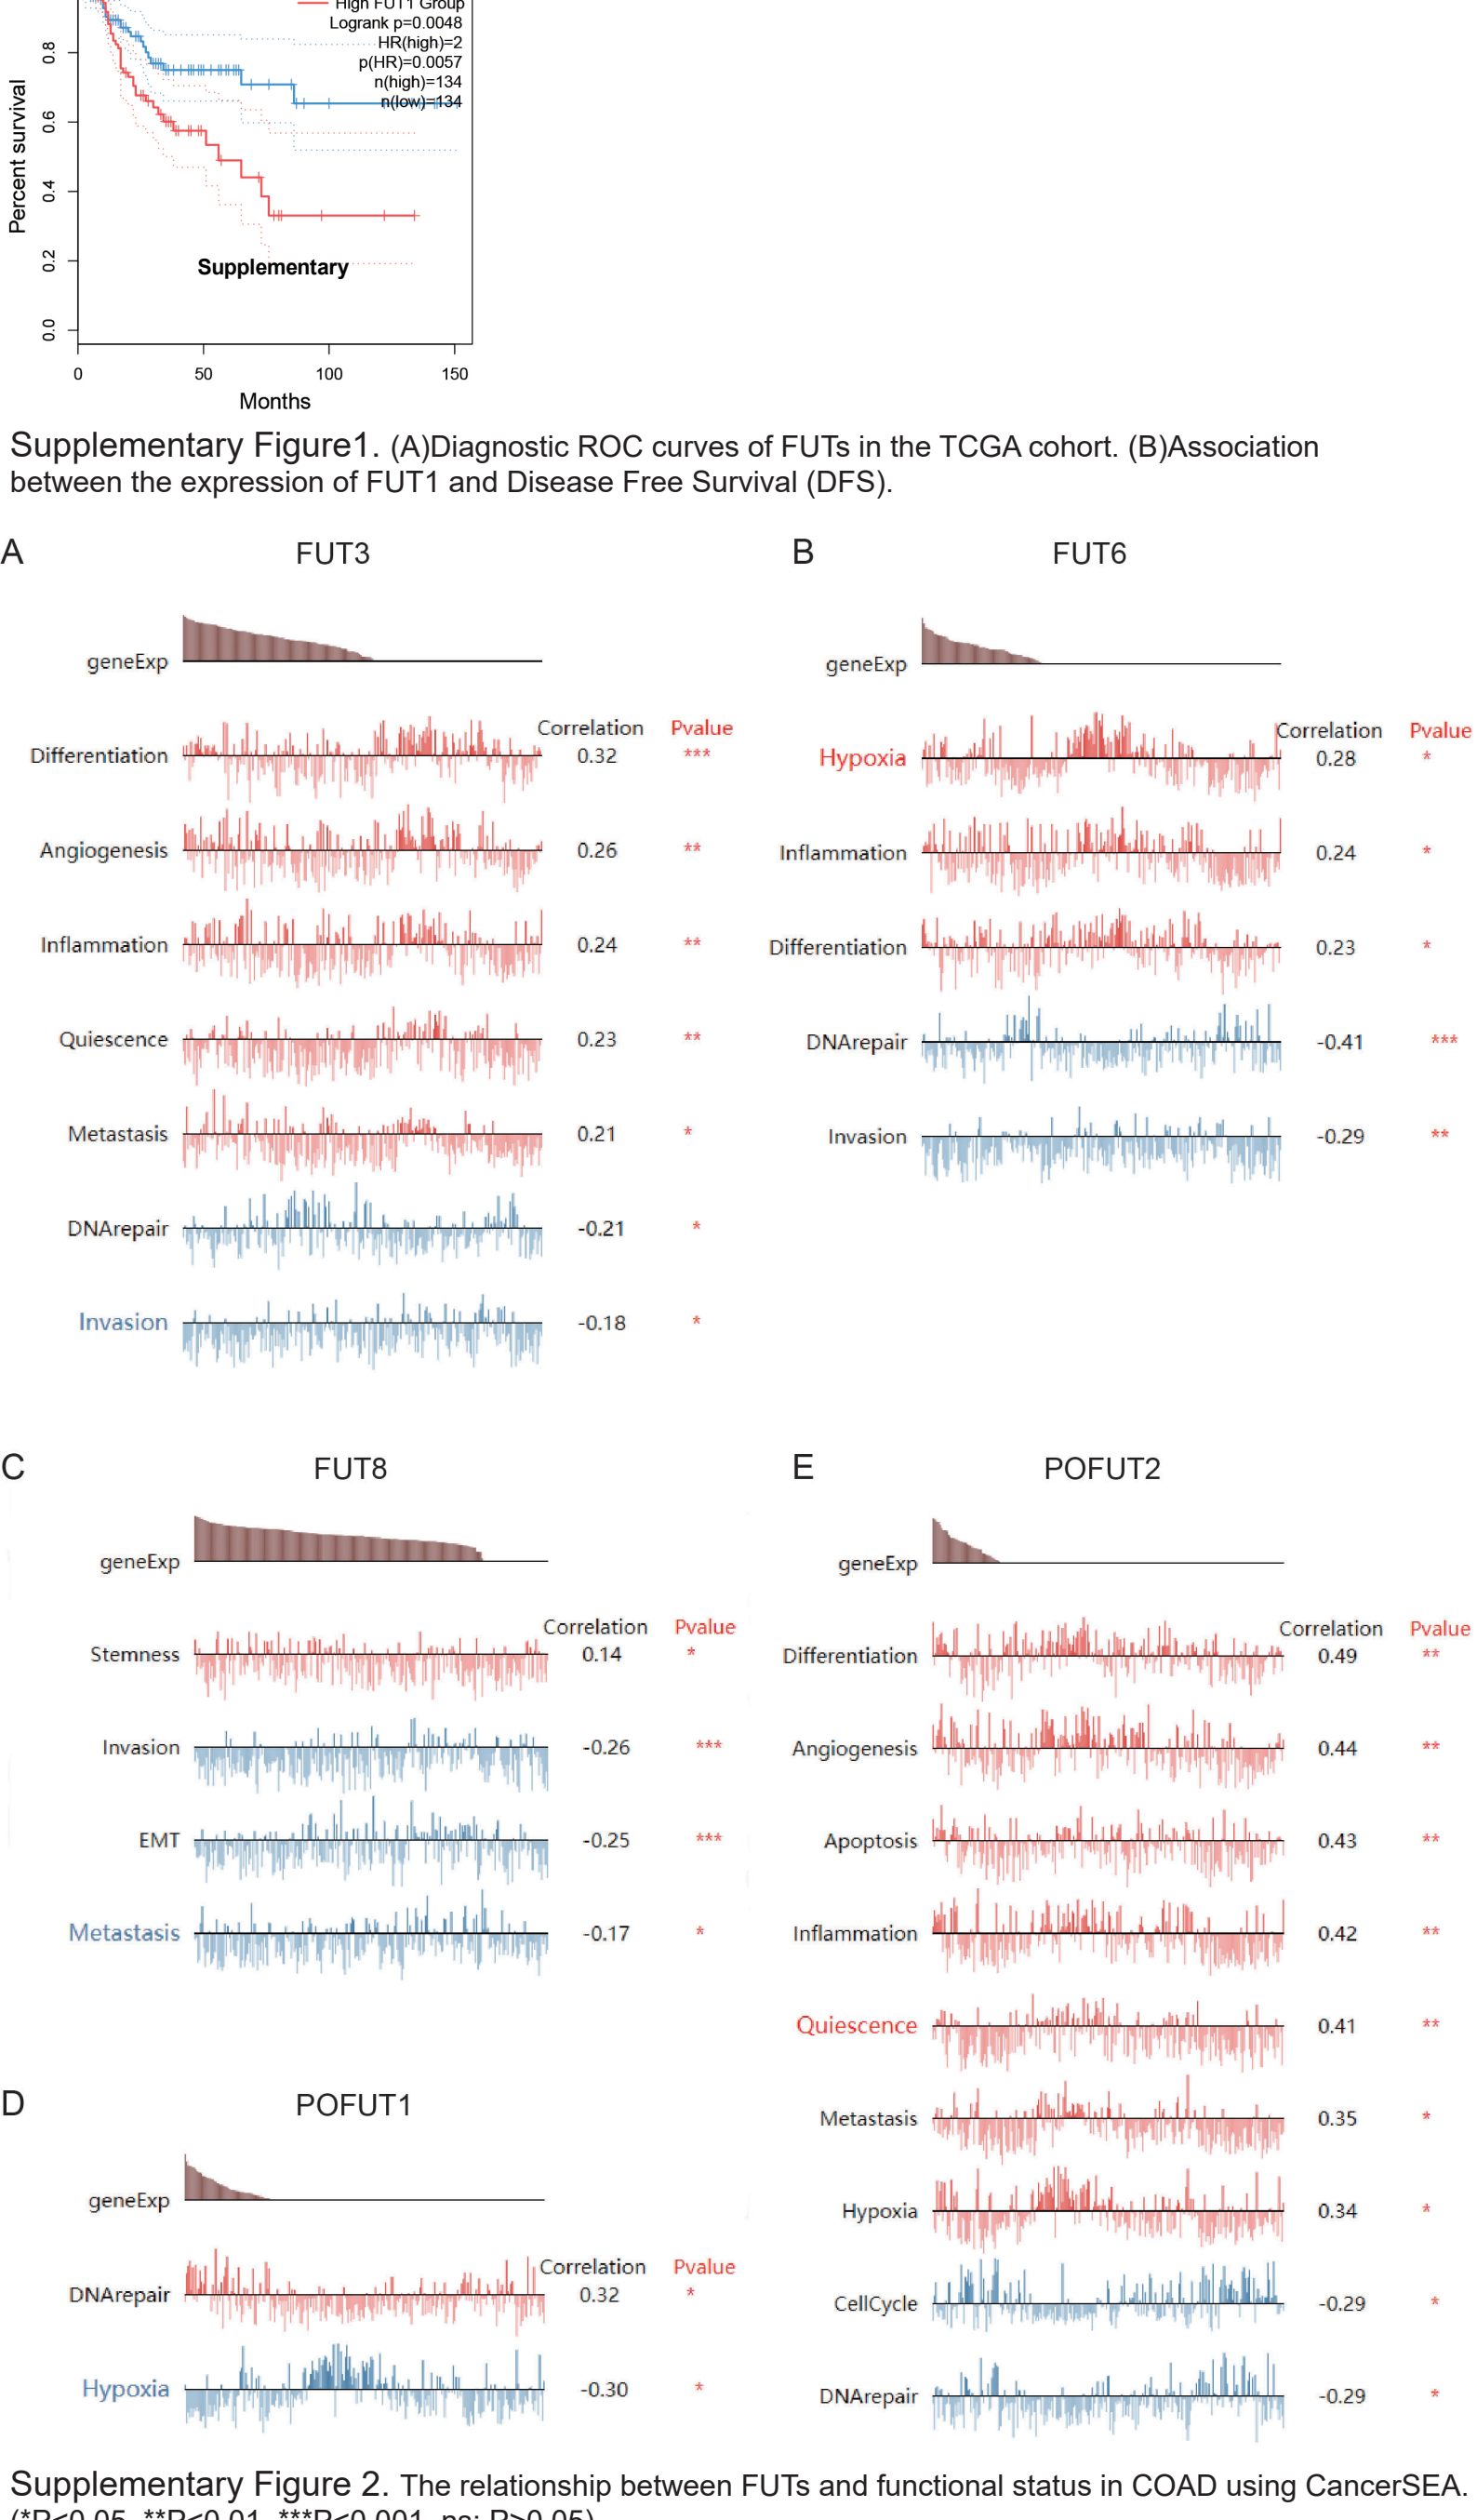

Supplementary Figure 2. The relationship between FUTs and functional status in COAD using CancerSEA. (\*P<0.05, \*\*P<0.01, \*\*\*P<0.001, ns: P>0.05).

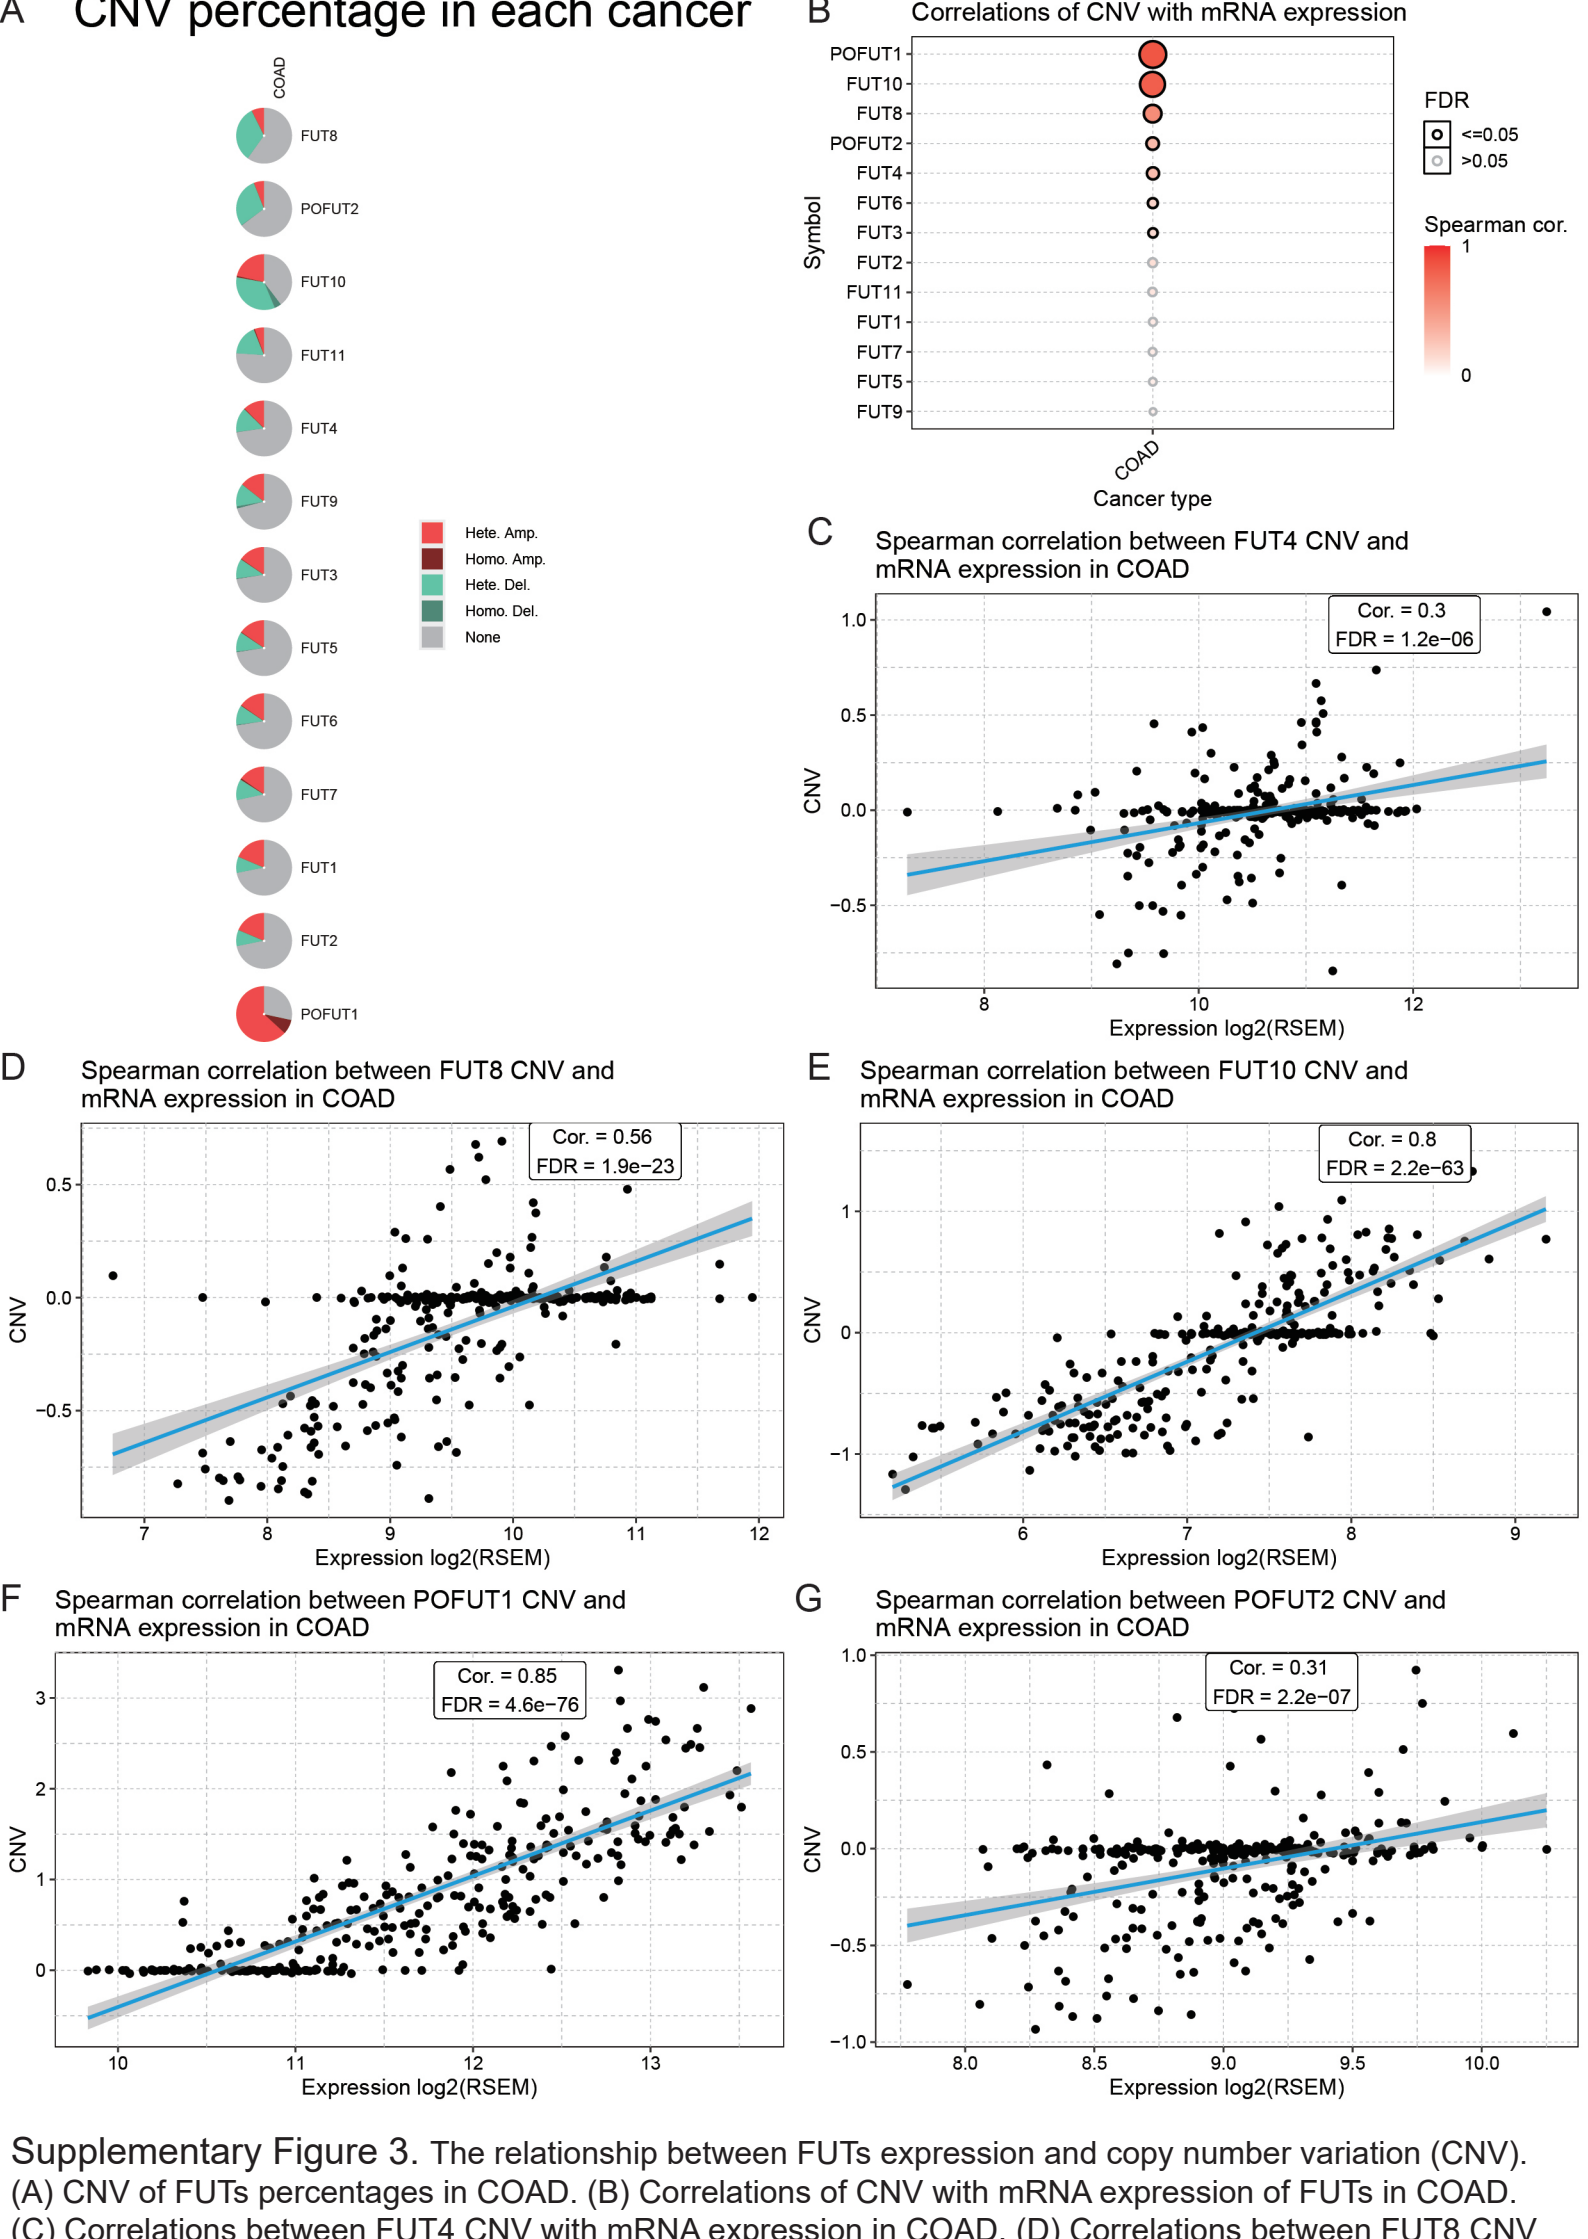

Supplementary Figure 3. The relationship between FUTs expression and copy number variation (CNV). (A) CNV of FUTs percentages in COAD. (B) Correlations of CNV with mRNA expression of FUTs in COAD. (C) Correlations between FUT4 CNV and mRNA expression in COAD. (D) Correlations between FUT8 CNV with mRNA expression in COAD. (E) Correlations between FUT10 CNV with mRNA expression in COAD. (F) Correlations between POFUT1 CNV with mRNA expression in COAD. (G) Correlations between POFUT2 CNV with mRNA expression in COAD.

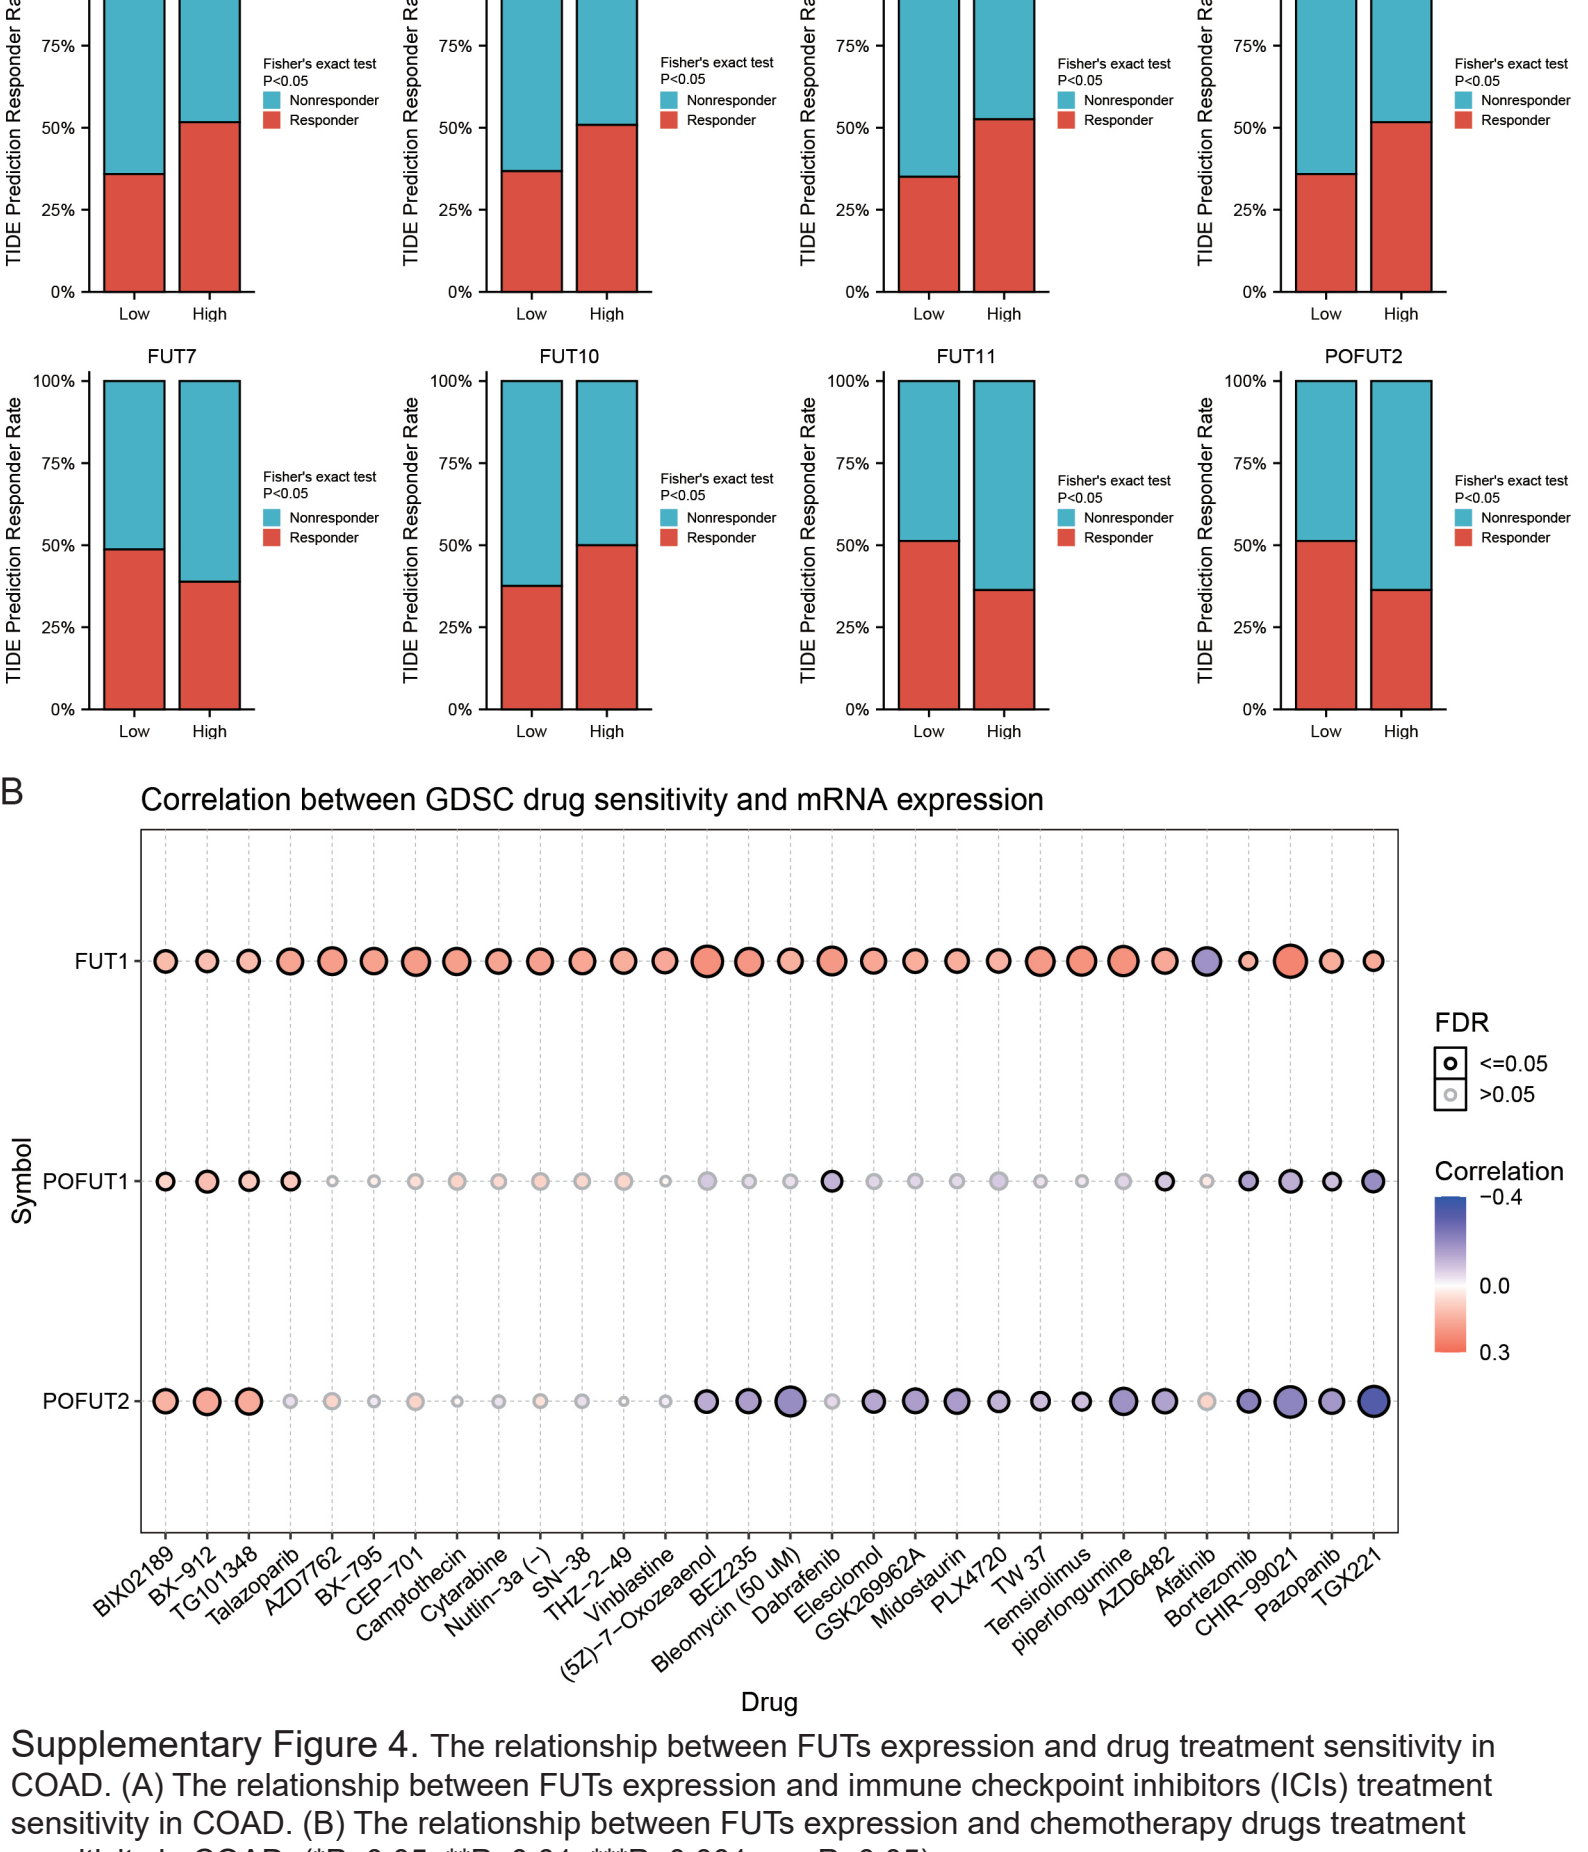

Supplementary Figure 4. The relationship between FUTs expression and drug treatment sensitivity in COAD. (A) The relationship between FUTs expression and immune checkpoint inhibitors (ICIs) treatment sensitivity in COAD. (B) The relationship between FUTs expression and chemotherapy drugs treatment sensitivity in COAD. (\*P<0.05, \*\*P<0.01, \*\*\*P<0.001, ns: P>0.05).

Supplementary Table 1 Primer information

|                |                         |
|----------------|-------------------------|
| human          |                         |
| FUT1           |                         |
| forward primer | CTTCCTGCTAGTCTGTGTCCT   |
| reverse primer | ATTGGGGTAGACAGTCCAGGT   |
| POFUT1         |                         |
| forward primer | AACCAGGCCGATCACTTCTTG   |
| reverse primer | GTTGGTGAAAGGAGGCTTGTG   |
| POFUT2         |                         |
| forward primer | ATGGCGAACTCAGCTTCG      |
| reverse primer | AGAGCGGATTCGGATATAGACA  |
| MUC2           |                         |
| forward primer | GAGGCAGAACCCGAAACC      |
| reverse primer | GGCGAAGTTGTAGTCGAGAG    |
| GAPDH          |                         |
| forward primer | CTGGGCTACACTGAGCACC     |
| reverse primer | AAGTGGTCGTTGAGGGCAATG   |
| mouse          |                         |
| FUT1           |                         |
| forward primer | TACCTCATCCATTGCAGACATCT |
| reverse primer | CTCCTGGGGTATTGTCCAAG    |
| POFUT1         |                         |
| forward primer | GGCCGGTTACCTGCTCTAC     |
| reverse primer | GCAGGCTTGTGATGTTGGTATTC |
| POFUT2         |                         |
| forward primer | ACCTCTGTATGATGCAACCC    |
| reverse primer | ACTCTCAGTCTTCAACAGCG    |
| MUC2           |                         |
| forward primer | AGGGCTCGGAATCCAGAAA     |
| reverse primer | CCAGGGAATCGGTAGACATCG   |
| GAPDH          |                         |
| forward primer | AGGTCGGTGTGAACGGATTG    |
| reverse primer | GGGGTCGTTGATGGCAACA     |
